# Supplementary material for: 字字珠玑圆润 句句曲尽人情——浅析《窦娥冤》的语言特点
Source: Royal Society of Chemistry journal article supplement (doi:10.1039/c8cp04988b), 2012-01-01
Supplement: c8cp04988b1.pdf [file c8cp04988b1.pdf]

### **Electronic Supplementary Information (ESI)**

Exploring the electronic structure of aluminum metal–organic framework Basolite A100: solid-state synchronous fluorescence spectroscopy reveals new charge excitation/relaxation pathways

Cole Grinnell and Alexander Samokhvalov\*

\*Correspondence:

Department of Chemistry, Morgan State University, 1700 East Cold Spring Lane, Baltimore, MD 21251, USA. Email [Alexandr.Samokhvalov@morgan.edu](mailto:Alexandr.Samokhvalov@morgan.edu)

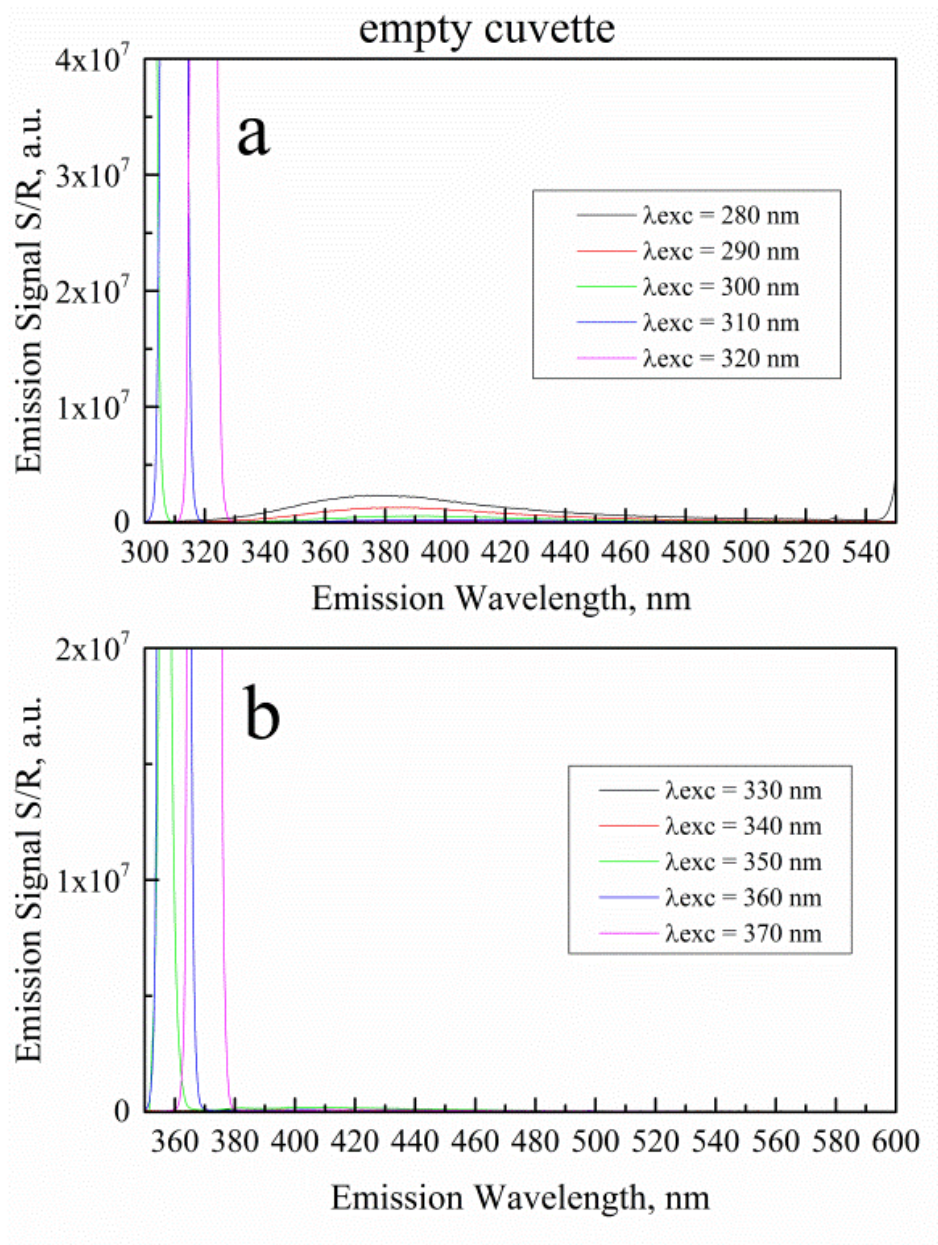

Figure S1. The solid-state “conventional” photoexcitation-wavelength dependent fluorescence emission spectra of an empty cuvette. a)  $\lambda_{exc} = 280 - 320$  nm. b)  $\lambda_{exc} = 330 - 370$  nm.

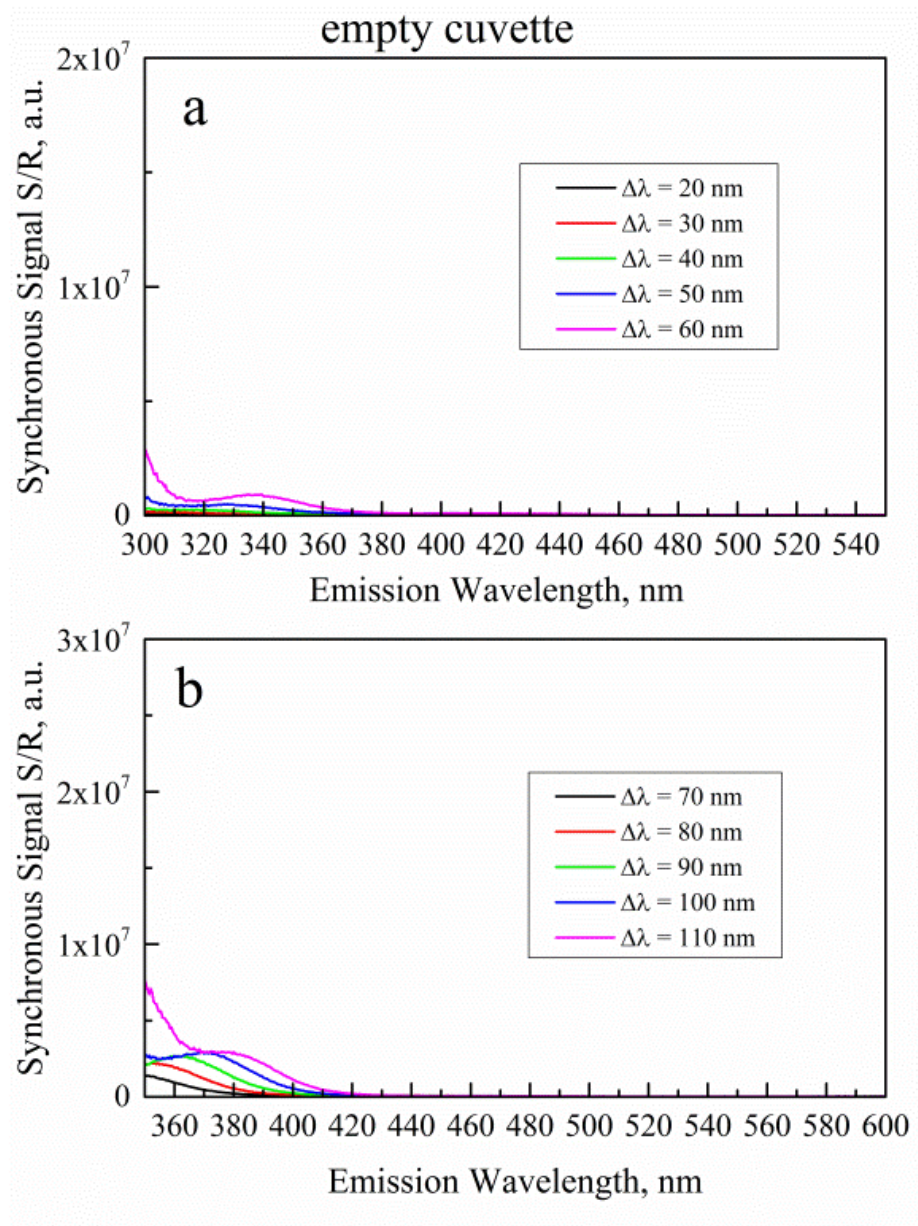

Figure S2. The solid-state synchronous fluorescence spectra of an empty cuvette at variable  $\Delta\lambda$ .

a)  $\Delta\lambda = 20 - 60$  nm. b)  $\Delta\lambda = 70 - 110$  nm.

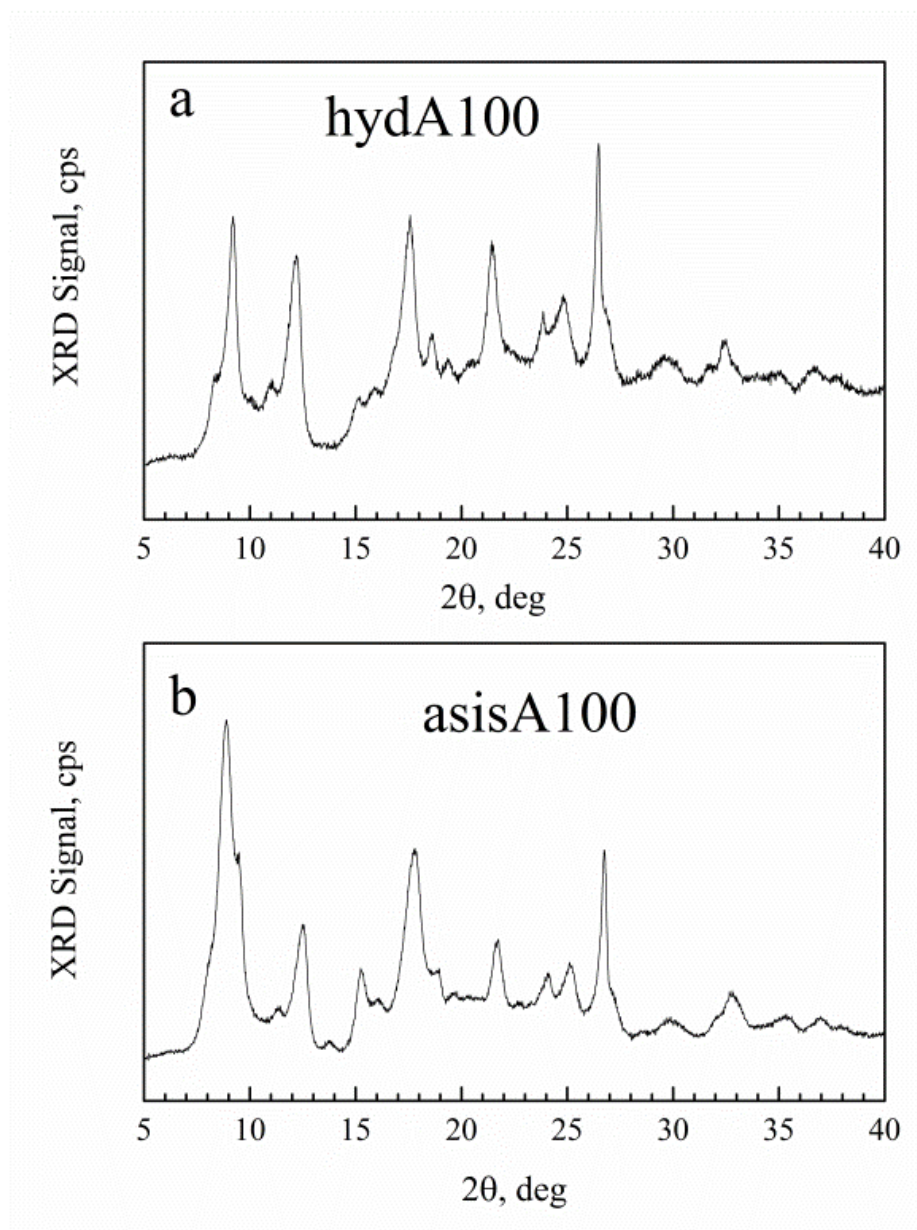

Figure S3. Powder XRD patterns of Basolite A100. a) The hydA100. b) The asisA100.

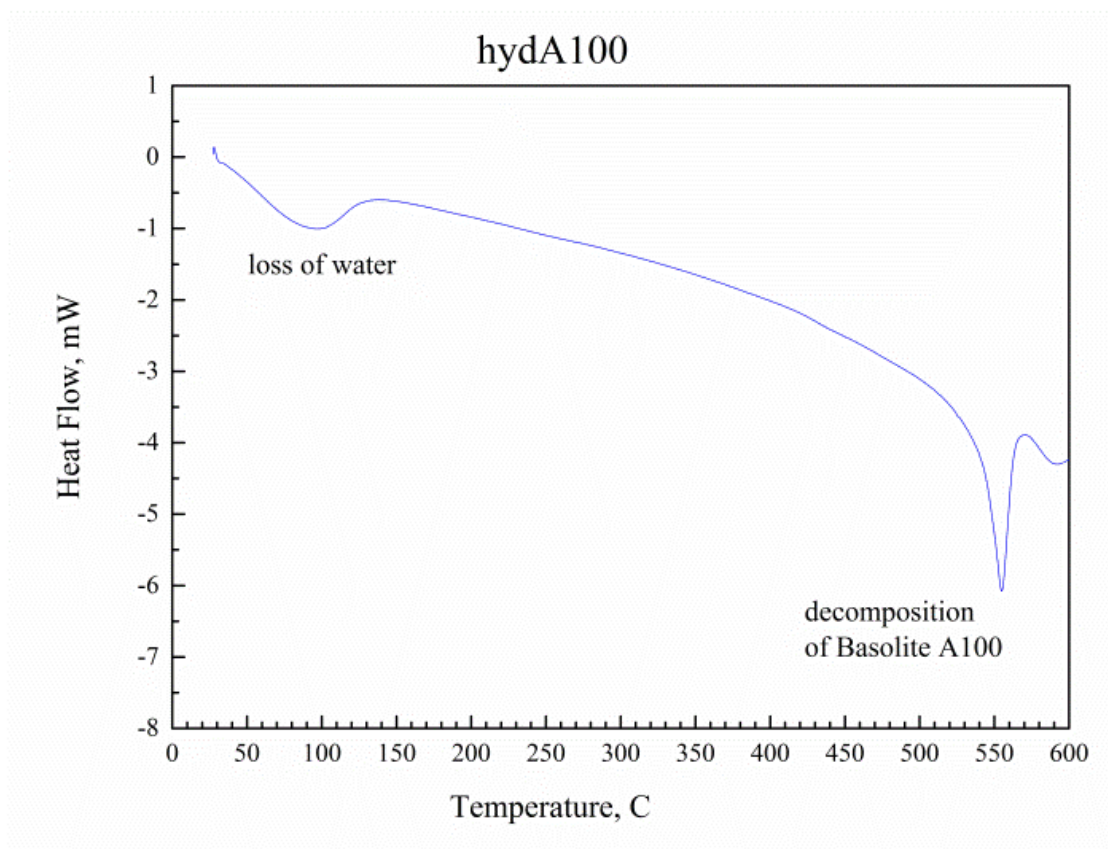

Figure S4. Differential scanning calorimetry (DSC) of hydA100.

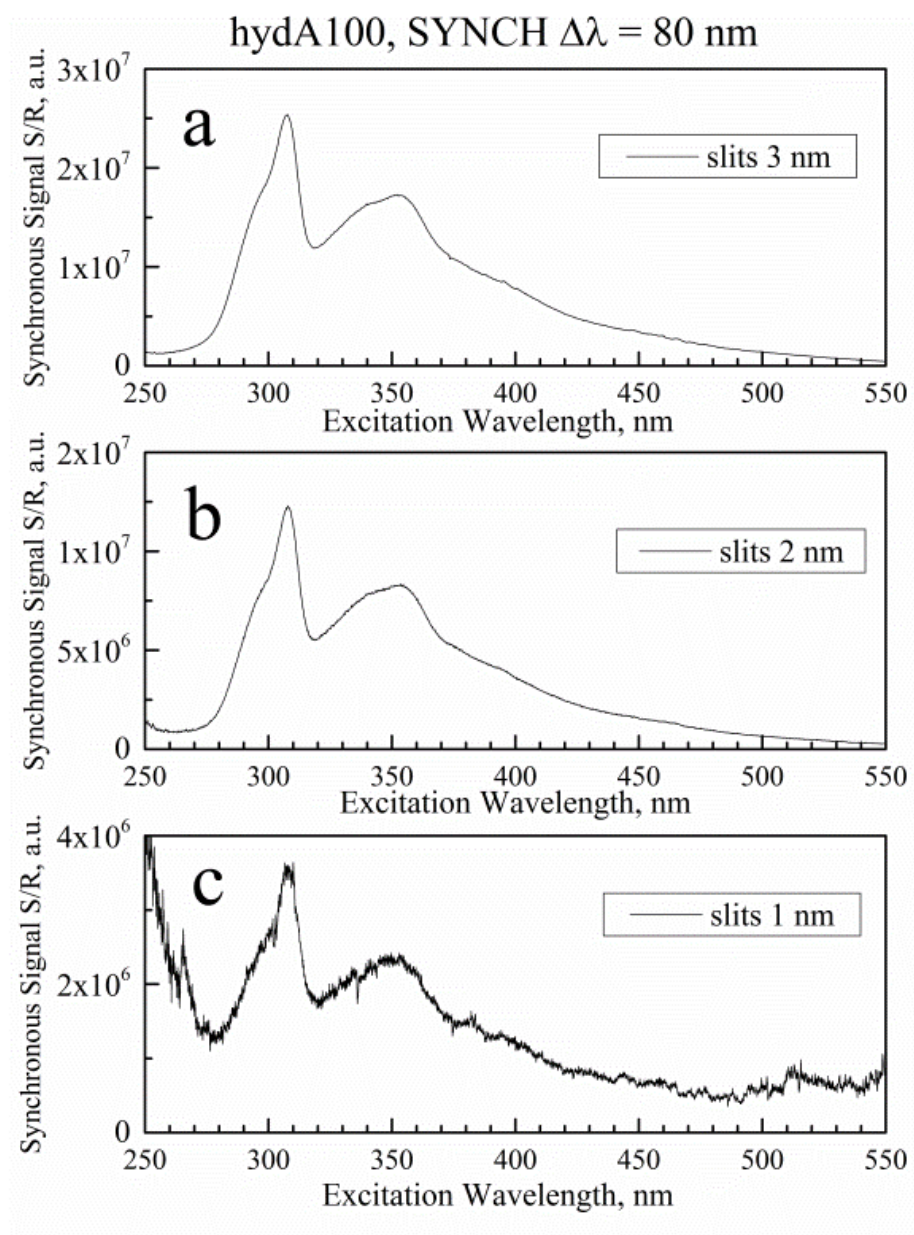

Figure S5. The solid-state synchronous fluorescence (excitation) spectra of hydA100 at  $\Delta\lambda = 80$  nm with variable optical slits. a) 3 nm. b) 2 nm. c) 1 nm.
